# Supplementary material for: Long noncoding RNA FOXD2-AS1 enhances chemotherapeutic resistance of laryngeal squamous cell carcinoma via STAT3 activation
Source: PubMed Central journal article supplement (PMC6971019; doi:10.1038/s41419-020-2232-7), 2020-01-20
Supplement: 41419_2020_2232_MOESM7_ESM.pdf [file 41419_2020_2232_MOESM7_ESM.pdf]

Please complete the table below to indicate the contributions of all named authors to the figures.

Figure 1:

These clinical samples is collected by Rui Li, Wenlin Liu, Xiaoli Sheng, Rong Zhong; These statistics are analysed by Zhongming Lu, Liangsi Chen, Xiaoning Luo, Siyi Zhang; These molecular experiments are did by Rui Li, Shuwei Chen, Jiandong Zhan, Xinghua Li; These figures are plotted by Rui Li, Shuwei Chen, Jiandong Zhan, Xinghua Li; Figure 1 is designed and inspected by Siyi Zhang, Quan Zhang, Tao Liu.

Figure 2:

These statistics are analysed by Quan Zhang, Zhongming Lu, Liangsi Chen, Xiaoning Luo, Siyi Zhang; These molecular experiments and cell experiments are did by Rui Li, Shuwei Chen, Jiandong Zhan, Xinghua Li; These figures are plotted by Rui Li, Shuwei Chen, Jiandong Zhan, Xinghua Li; Figure 2 is designed and inspected by Siyi Zhang, Quan Zhang, Tao Liu.

Figure 3:

These statistics are analysed by Zhongming Lu, Liangsi Chen, Xiaoning Luo, Siyi Zhang; These molecular experiments and cell experiments, and animal experiments are did by Rui Li, Shuwei Chen, Jiandong Zhan, Xinghua Li; These figures are plotted by Rui Li, Shuwei Chen, Jiandong Zhan, Xinghua Li; Figure 3 is designed and inspected by Siyi Zhang, Quan Zhang, Tao Liu.

Figure 4:

These statistics are analysed by Zhongming Lu, Liangsi Chen, Xiaoning Luo, Siyi Zhang, Tao Liu; These molecular experiments and cell experiments are did by Rui Li, Shuwei Chen, Jiandong Zhan, Xinghua Li; Parts of these cell experiments are did by Yameng Hu, Ying Ouyang; These figures are plotted by Rui Li, Shuwei Chen, Jiandong Zhan, Xinghua Li; Figure 4 is designed and inspected by Siyi Zhang, Quan Zhang, Tao Liu.

Figure 5:

These statistics are analysed by Zhongming Lu, Liangsi Chen, Xiaoning Luo, Siyi Zhang; These molecular experiments are did by Rui Li, Shuwei Chen, Jiandong Zhan, Xinghua Li; These cell experiments are did by Rui Li, Shuwei Chen, Jiandong Zhan, Xinghua Li, Yameng Hu, Ying Ouyang; These figures are plotted by Rui Li, Shuwei Chen, Jiandong Zhan, Xinghua Li; Figure 5 is designed and inspected by Siyi Zhang, Quan Zhang, Tao Liu.

Figure 6:

These statistics are analysed by Zhongming Lu, Liangsi Chen, Xiaoning Luo, Siyi Zhang; These molecular experiments and cell experiments are did by Rui Li, Shuwei Chen, Jiandong Zhan, Xinghua Li; These figures are plotted by Rui Li, Shuwei Chen, Jiandong Zhan, Xinghua Li; Figure 6 is designed and inspected by Siyi Zhang, Quan Zhang, Tao Liu.

Signed for and on behalf of the Author(s):

Print Name:

Date:

Siyi Zhang

Siyi Zhang

2019/12/05

Rui Li, Shuwei Chen, Jiandong Zhan, Xinghua Li, Ying Ouyang, Wenlin Liu, Xiaoli Sheng, Zhongming Lu, Rong Zhong, Liangsi Chen, Xiaoning Luo, Yameng Hu, Tao Liu, Quan Zhang
